# Supplementary material for: Aberrantly low STAT3 and STAT5 responses are associated with poor outcome and an inflammatory gene expression signature in pediatric acute myeloid leukemia
Source: PubMed Central journal article supplement (PMC8390401; doi:10.1007/s12094-021-02621-w), 2021-05-04
Supplement: 12094_2021_2621_MOESM1_ESM.pdf [file 12094_2021_2621_MOESM1_ESM.pdf]

| <b>Supplemental Table S1. Soluble factor levels in AML bone marrow and HS5 CM</b> |                                 |                                 |                         |
|-----------------------------------------------------------------------------------|---------------------------------|---------------------------------|-------------------------|
| Soluble Factor                                                                    | AML BM plasma – Minimum (pg/ml) | AML BM plasma – Maximum (pg/ml) | 50% HS5 CM ± SD (pg/ml) |
| EGF                                                                               | 4.6                             | 343.4                           | 5.7 ± 1.2               |
| Eotaxin                                                                           | 21.9                            | 327.2                           | 22.1 ± 14.4             |
| FGF-2                                                                             | 16.5                            | 681.4                           | 41.6 ± 13.8             |
| Flt3L                                                                             | 2.09                            | 119.2                           | 20.3 ± 11.1             |
| Fractalkine                                                                       | 7.1                             | 1072                            | 173.1 ± 49.5            |
| G-CSF                                                                             | 3.4                             | 9386                            | 7741.4 ± 4981.8         |
| GM-CSF                                                                            | 2.8                             | 2425                            | 207.1 ± 121.0           |
| GRO                                                                               | 16.4                            | 13741                           | 1303.9 ± 841.4          |
| IFN $\alpha$                                                                      | 2.8                             | 475.6                           | 25.4 ± 14.2             |
| IFN $\gamma$                                                                      | 3.8                             | 1033                            | 9.2 ± 5.5               |
| IL-1 $\alpha$                                                                     | 3.7                             | 1325                            | 12.0 ± 6.9              |
| IL-1 $\beta$                                                                      | 1.4                             | 10709                           | 2.2 ± 1.6               |
| IL-2                                                                              | 1.1                             | 159.1                           | 5.4 ± 5.4               |
| IL-3                                                                              | 0.6                             | 208.0                           | 0.7 ± 0.2               |
| IL-4                                                                              | 3.2                             | 140.5                           | 20.6 ± 12.5             |
| IL-5                                                                              | 1.2                             | 241.9                           | 1.7 ± 0.5               |
| IL-6                                                                              | 1.6                             | 12059                           | 2890.4 ± 2340.5         |
| IL-7                                                                              | 1.8                             | 26.0                            | 24.6 ± 10.5             |
| <i>IL-8</i>                                                                       | <i>12.0</i>                     | <i>4202</i>                     | <i>9820 ± 3217.8</i>    |
| IL-9                                                                              | 1.0                             | 55.9                            | 3.9 ± 2.3               |
| IL-10                                                                             | 1.7                             | 267.3                           | 6.3 ± 5.7               |
| IL-12p40                                                                          | 1.8                             | 534.7                           | 25.0 ± 24.3             |
| IL-12p70                                                                          | 2.6                             | 389.4                           | 4.3 ± 3.5               |
| IL-13                                                                             | 0.5                             | 618.2                           | 10.4 ± 8.0              |
| IL-15                                                                             | 0.6                             | 59.0                            | 5.5 ± 3.2               |
| IL-17 $\alpha$                                                                    | 1.2                             | 346.1                           | 2.3 ± 1.4               |
| IL-1RA                                                                            | 11.9                            | 5785                            | 32.1 ± 25.0             |
| IP-10                                                                             | 127.3                           | 12324                           | 690.3 ± 356.0           |
| <i>MCP-1</i>                                                                      | <i>22.9</i>                     | <i>5078</i>                     | <i>8134 ± 4734.2</i>    |
| <i>MCP-3</i>                                                                      | <i>1.6</i>                      | <i>2057</i>                     | <i>5660.1 ± 4748.8</i>  |
| <i>MDC</i>                                                                        | <i>67.1</i>                     | <i>2411</i>                     | <i>18.3 ± 11.7</i>      |
| MIP-1 $\alpha$                                                                    | 2.9                             | 7758                            | 11.7                    |
| MIP-1 $\beta$                                                                     | 2.3                             | 1335                            | 10.3 ± 7.0              |
| PDGF-AA                                                                           | 103.1                           | 4126                            | 137.8 ± 9.2             |
| <i>PDGF-BB</i>                                                                    | <i>350.2</i>                    | <i>9170</i>                     | <i>74.2 ± 82.1</i>      |
| <i>RANTES</i>                                                                     | <i>999.8</i>                    | <i>13229</i>                    | <i>163.2 ± 66.5</i>     |
| <i>sCD40L</i>                                                                     | <i>70.5</i>                     | <i>16415</i>                    | <i>51.8 ± 35.7</i>      |
| <i>TGF<math>\alpha</math></i>                                                     | <i>2.4</i>                      | <i>204.6</i>                    | <i>1.7</i>              |
| <i>TNF<math>\alpha</math></i>                                                     | <i>4.8</i>                      | <i>1376</i>                     | <i>2.2 ± 0.8</i>        |
| TNF $\beta$                                                                       | 1.7                             | 737.5                           | 8.0 ± 8.9               |
| VEGF                                                                              | 34.3                            | 2834                            | 513.7 ± 57.8            |

Factor levels were measured with the Milliplex Human Cytokine Magnetic Bead 41-plex kit. (EMD Millipore) for diagnostic bone marrow plasma from pediatric AML patients (n=31) and for HS5 CM (n=3 replicates). These results have been reported in part previously, and detailed methods are found within those publications (see references 19 and 20). Factors for which the average 50% CM level is outside the range for AML bone marrow plasma are indicated with italics.

**Supplemental Table S2. Patient Characteristics for pY-STAT3 Response Groups**

| Characteristic                  | G-CSF-induced<br>pY-STAT3 ΔMFI ≤1.5 |              | G-CSF-induced<br>pY-STAT3 ΔMFI >1.5 |              | p                | CM-induced<br>pY-STAT3 ΔMFI ≤1.76 |              | CM-induced<br>pY-STAT3 ΔMFI >1.76 |              | p            |
|---------------------------------|-------------------------------------|--------------|-------------------------------------|--------------|------------------|-----------------------------------|--------------|-----------------------------------|--------------|--------------|
|                                 | N                                   | %            | N                                   | %            |                  | N                                 | %            | N                                 | %            |              |
| Total                           | 24                                  | 21.6%        | 87                                  | 78.4%        |                  | 33                                | 29.2%        | 80                                | 70.8%        |              |
| <b>Study</b>                    |                                     |              |                                     |              |                  |                                   |              |                                   |              |              |
| AAML03P1                        | 3                                   | 12.5%        | 12                                  | 13.8%        | 1.000            | 5                                 | 15.2%        | 10                                | 12.5%        | 0.763        |
| AAML0531                        | 21                                  | 87.5%        | 75                                  | 86.2%        |                  | 28                                | 84.8%        | 70                                | 87.5%        |              |
| Arm A                           | 3                                   | 14.3%        | 42                                  | 56.0%        | <b>&lt;0.001</b> | 11                                | 39.3%        | 34                                | 48.6%        | 0.405        |
| Arm B                           | 18                                  | 85.7%        | 33                                  | 44.0%        |                  | 17                                | 60.7%        | 36                                | 51.4%        |              |
| <b>Gender</b>                   |                                     |              |                                     |              |                  |                                   |              |                                   |              |              |
| Male                            | 14                                  | 58.3%        | 43                                  | 49.4%        | 0.440            | 23                                | 69.7%        | 35                                | 43.8%        | <b>0.012</b> |
| Female                          | 10                                  | 41.7%        | 44                                  | 50.6%        |                  | 10                                | 30.3%        | 45                                | 56.3%        |              |
| <b>Age (years) at diagnosis</b> |                                     |              |                                     |              |                  |                                   |              |                                   |              |              |
| 0-1 yo                          | 5                                   | 20.8%        | 5                                   | 5.7%         | <b>0.037</b>     | 6                                 | 18.2%        | 4                                 | 5.0%         | 0.061        |
| 2-10 yo                         | 7                                   | 29.2%        | 34                                  | 39.1%        | 0.373            | 12                                | 36.4%        | 29                                | 36.3%        | 0.991        |
| ≥ 11 yo                         | 12                                  | 50.0%        | 48                                  | 55.2%        | 0.653            | 15                                | 45.5%        | 47                                | 58.8%        | 0.197        |
| Median (range)                  | 10.8                                | (1.0 - 20.7) | 11.8                                | (0.6 - 28.7) | 0.328            | 8.4                               | (0.6 - 20.4) | 12.1                              | (1.2 - 28.7) | <b>0.047</b> |
| <b>Race</b>                     |                                     |              |                                     |              |                  |                                   |              |                                   |              |              |
| American/Alaskan Native         | 0                                   | 0.0%         | 1                                   | 1.3%         | 1.000            | 0                                 | 0.0%         | 1                                 | 1.4%         | 1.000        |
| Asian                           | 0                                   | 0.0%         | 2                                   | 2.5%         | 1.000            | 1                                 | 3.1%         | 1                                 | 1.4%         | 0.527        |
| Black or African American       | 4                                   | 18.2%        | 6                                   | 7.5%         | 0.217            | 5                                 | 15.6%        | 5                                 | 7.0%         | 0.278        |
| White                           | 18                                  | 81.8%        | 71                                  | 88.8%        | 0.470            | 26                                | 81.3%        | 64                                | 90.1%        | 0.217        |
| Unknown                         | 2                                   |              | 7                                   |              |                  | 1                                 |              | 9                                 |              |              |
| <b>Ethnicity</b>                |                                     |              |                                     |              |                  |                                   |              |                                   |              |              |
| Hispanic                        | 7                                   | 30.4%        | 10                                  | 12.0%        | 0.051            | 7                                 | 21.2%        | 10                                | 13.3%        | 0.390        |
| Not Hispanic                    | 16                                  | 69.6%        | 73                                  | 88.0%        |                  | 26                                | 78.8%        | 65                                | 86.7%        |              |
| Unknown                         | 1                                   |              | 4                                   |              |                  | 0                                 |              | 5                                 |              |              |
| <b>Cytogenetics</b>             |                                     |              |                                     |              |                  |                                   |              |                                   |              |              |
| Normal                          | 7                                   | 29.2%        | 25                                  | 29.4%        | 0.981            | 14                                | 42.4%        | 19                                | 24.4%        | 0.057        |
| t(8;21)                         | 1                                   | 4.2%         | 13                                  | 15.3%        | 0.297            | 1                                 | 3.0%         | 14                                | 17.9%        | <b>0.036</b> |
| inv(16)                         | 1                                   | 4.2%         | 23                                  | 27.1%        | <b>0.017</b>     | 4                                 | 12.1%        | 20                                | 25.6%        | 0.114        |
| KMT2A-rearranged                | 5                                   | 20.8%        | 7                                   | 8.2%         | 0.132            | 5                                 | 15.2%        | 7                                 | 9.0%         | 0.336        |
| t(6;9)                          | 0                                   | 0.0%         | 3                                   | 3.5%         | 1.000            | 0                                 | 0.0%         | 3                                 | 3.8%         | 0.553        |
| monosomy 7                      | 0                                   | 0.0%         | 1                                   | 1.2%         | 1.000            | 0                                 | 0.0%         | 1                                 | 1.3%         | 1.000        |
| del(7q)                         | 1                                   | 4.2%         | 1                                   | 1.2%         | 0.394            | 1                                 | 3.0%         | 1                                 | 1.3%         | 0.508        |
| monosomy 5/del(5q)              | 1                                   | 4.2%         | 0                                   | 0.0%         | 0.220            | 0                                 | 0.0%         | 1                                 | 1.3%         | 1.000        |

|                                           |    |       |    |       |              |    |       |    |       |              |
|-------------------------------------------|----|-------|----|-------|--------------|----|-------|----|-------|--------------|
| +8                                        | 2  | 8.3%  | 3  | 3.5%  | 0.303        | 2  | 6.1%  | 3  | 3.8%  | 0.633        |
| Other                                     | 6  | 25.0% | 9  | 10.6% | 0.091        | 6  | 18.2% | 9  | 11.5% | 0.356        |
| Unknown                                   | 0  |       | 2  |       |              | 0  |       | 2  |       |              |
| <b>French-American-British morphology</b> |    |       |    |       |              |    |       |    |       |              |
| M0                                        | 2  | 11.8% | 0  | 0.0%  | <b>0.029</b> | 1  | 3.7%  | 1  | 1.4%  | 0.473        |
| M1                                        | 0  | 0.0%  | 13 | 16.3% | 0.116        | 5  | 18.5% | 8  | 11.1% | 0.334        |
| M2                                        | 1  | 5.9%  | 25 | 31.3% | <b>0.036</b> | 3  | 11.1% | 25 | 34.7% | <b>0.020</b> |
| M4                                        | 6  | 35.3% | 30 | 37.5% | 0.864        | 11 | 40.7% | 25 | 34.7% | 0.579        |
| M5                                        | 4  | 23.5% | 8  | 10.0% | 0.215        | 4  | 14.8% | 8  | 11.1% | 0.731        |
| M6                                        | 1  | 5.9%  | 0  | 0.0%  | 0.175        | 1  | 3.7%  | 0  | 0.0%  | 0.273        |
| M7                                        | 1  | 5.9%  | 0  | 0.0%  | 0.175        | 0  | 0.0%  | 1  | 1.4%  | 1.000        |
| Other                                     | 2  | 11.8% | 4  | 5.0%  | 0.282        | 2  | 7.4%  | 4  | 5.6%  | 0.663        |
| Unknown                                   | 7  |       | 7  |       |              | 6  |       | 8  |       |              |
| <b>FLT3/ITD status</b>                    |    |       |    |       |              |    |       |    |       |              |
| Positive                                  | 5  | 20.8% | 19 | 22.1% | 0.895        | 7  | 21.2% | 17 | 21.5% | 0.971        |
| Negative (WT)                             | 19 | 79.2% | 67 | 77.9% |              | 26 | 78.8% | 62 | 78.5% |              |
| Unknown                                   | 0  |       | 1  |       |              | 0  |       | 1  |       |              |
| <b>CEBP<math>\alpha</math> status</b>     |    |       |    |       |              |    |       |    |       |              |
| Mutated                                   | 1  | 4.2%  | 10 | 11.8% | 0.450        | 3  | 9.1%  | 8  | 10.3% | 0.851        |
| Wild-type                                 | 23 | 95.8% | 75 | 87.2% |              | 30 | 90.9% | 70 | 88.6% |              |
| Unknown                                   | 0  |       | 2  |       |              | 0  |       | 2  |       |              |
| <b>NPM status</b>                         |    |       |    |       |              |    |       |    |       |              |
| Mutated                                   | 5  | 20.8% | 11 | 12.9% | 0.339        | 8  | 24.2% | 8  | 10.3% | 0.076        |
| Wild-type                                 | 19 | 79.2% | 74 | 87.1% |              | 25 | 75.8% | 70 | 89.7% |              |
| Unknown                                   | 0  |       | 2  |       |              | 0  |       | 2  |       |              |
| <b>WT1 status</b>                         |    |       |    |       |              |    |       |    |       |              |
| Mutated                                   | 1  | 4.2%  | 8  | 9.4%  | 0.681        | 2  | 6.1%  | 7  | 9.0%  | 0.723        |
| Wild-type                                 | 23 | 95.8% | 77 | 90.6% |              | 31 | 93.9% | 71 | 91.0% |              |
| Unknown                                   | 0  |       | 2  |       |              | 0  |       | 2  |       |              |
| <b>Cytomolecular Risk<sup>1</sup></b>     |    |       |    |       |              |    |       |    |       |              |
| Standard                                  | 12 | 50.0% | 17 | 20.0% | <b>0.003</b> | 14 | 42.4% | 16 | 20.5% | <b>0.018</b> |
| Low                                       | 8  | 33.3% | 54 | 63.5% | <b>0.008</b> | 16 | 48.5% | 47 | 60.3% | 0.253        |
| High                                      | 4  | 16.7% | 14 | 16.5% | 1.000        | 3  | 9.1%  | 15 | 19.2% | 0.185        |
| Unknown                                   | 0  |       | 2  |       |              | 0  |       | 2  |       |              |
| <b>MRD at End Induction 1</b>             |    |       |    |       |              |    |       |    |       |              |

|                                                    |             |            |             |           |              |             |            |             |           |       |
|----------------------------------------------------|-------------|------------|-------------|-----------|--------------|-------------|------------|-------------|-----------|-------|
| Positive <sup>2</sup>                              | 5           | 26.3%      | 23          | 31.9%     | 0.636        | 5           | 19.2%      | 24          | 36.4%     | 0.111 |
| Negative                                           | 14          | 73.7%      | 49          | 68.1%     |              | 21          | 80.8%      | 42          | 63.6%     |       |
| Unknown                                            | 5           |            | 15          |           |              | 7           |            | 14          |           |       |
| <b>Morphology at End Induction 1</b>               |             |            |             |           |              |             |            |             |           |       |
| CR <sup>3</sup>                                    | 15          | 62.5%      | 69          | 81.2%     | 0.055        | 28          | 84.8%      | 58          | 74.4%     | 0.227 |
| Not CR                                             | 9           | 37.5%      | 16          | 18.8%     |              | 5           | 15.2%      | 20          | 25.6%     |       |
| Unevaluable                                        | 0           |            | 2           |           |              | 0           |            | 2           |           |       |
| <b>WBC at study entry (x10<sup>3</sup>/MicroL)</b> |             |            |             |           |              |             |            |             |           |       |
| <100                                               | 20          | 83.3%      | 67          | 77.0%     | 0.505        | 28          | 84.8%      | 61          | 76.3%     | 0.310 |
| ≥100                                               | 4           | 16.7%      | 20          | 23.0%     |              | 5           | 15.2%      | 19          | 23.8%     |       |
| <b>BM Blast% at study entry</b>                    |             |            |             |           |              |             |            |             |           |       |
| Median (range)                                     | 71          | (32 - 100) | 70          | (3 - 100) | 0.736        | 66.2        | (23 - 100) | 71          | (3 - 100) | 0.668 |
| <b>Blood Blast% at study entry</b>                 |             |            |             |           |              |             |            |             |           |       |
| Median (range)                                     | 45          | (0 - 93)   | 51          | (0 - 97)  | 0.273        | 40          | (0 - 95)   | 56          | (0 - 97)  | 0.054 |
| <b>Outcomes</b>                                    |             |            |             |           |              |             |            |             |           |       |
| 5 year EFS from study entry <sup>4</sup>           | 29.2 ± 18.6 |            | 56.4 ± 10.8 |           | <b>0.044</b> | 36.4 ± 16.7 |            | 57.2 ± 11.4 |           | 0.051 |
| 5 year OS from study entry <sup>4</sup>            | 54.2 ± 20.3 |            | 68.4 ± 10.3 |           | 0.244        | 57.1 ± 17.4 |            | 69.2 ± 10.8 |           | 0.172 |

1. Cytomolecular risk groups: Low: t(8;21), inv(16), NPM1<sup>mut</sup>, CEBPα<sup>mut</sup>; High: monosomy 5/7, FLT3/ITD with allelic ratio > 0.4; Standard: no low or high risk criteria with known cytogenetics
2. Minimal residual disease by flow cytometry, positive: ≥0.02%
3. CR: complete remission with <5% blasts by morphology
4. Percent ± 2SE% with log-rank p-values

| Supplemental Table S3. Patient Characteristics for pY-STAT5 Response Groups |                                   |              |                                       |              |                                   |              |              |
|-----------------------------------------------------------------------------|-----------------------------------|--------------|---------------------------------------|--------------|-----------------------------------|--------------|--------------|
|                                                                             | CM-induced<br>pY-STAT5 ΔMFI ≤1.18 |              | CM-induced<br>pY-STAT5 ΔMFI 1.19-2.25 |              | CM-induced<br>pY-STAT5 ΔMFI >2.25 |              |              |
| Characteristic                                                              | N                                 | %            | N                                     | %            | N                                 | %            | p            |
| Total                                                                       | 28                                | 24.8%        | 73                                    | 64.6%        | 12                                | 10.6%        |              |
| <b>Study</b>                                                                |                                   |              |                                       |              |                                   |              |              |
| AAML03P1                                                                    | 3                                 | 10.7%        | 10                                    | 13.7%        | 2                                 | 16.7%        | 0.865        |
| AAML0531                                                                    | 25                                | 89.3%        | 63                                    | 86.3%        | 10                                | 83.3%        |              |
| Arm A                                                                       | 10                                | 40.0%        | 30                                    | 47.6%        | 5                                 | 50.0%        | 0.782        |
| Arm B                                                                       | 15                                | 60.0%        | 33                                    | 52.4%        | 5                                 | 50.0%        |              |
| <b>Gender</b>                                                               |                                   |              |                                       |              |                                   |              |              |
| Male                                                                        | 16                                | 57.1%        | 37                                    | 50.7%        | 5                                 | 41.7%        | 0.657        |
| Female                                                                      | 12                                | 42.9%        | 36                                    | 49.3%        | 7                                 | 58.3%        |              |
| <b>Age (years) at diagnosis</b>                                             |                                   |              |                                       |              |                                   |              |              |
| 0-1 yo                                                                      | 6                                 | 21.4%        | 4                                     | 5.5%         | 0                                 | 0.0%         | <b>0.024</b> |
| 2-10 yo                                                                     | 9                                 | 32.1%        | 28                                    | 38.4%        | 4                                 | 33.3%        | 0.824        |
| ≥ 11 yo                                                                     | 13                                | 46.4%        | 41                                    | 56.2%        | 8                                 | 66.7%        | 0.466        |
| Median (range)                                                              | 8.3                               | (0.6 - 20.4) | 11.9                                  | (1.2 - 28.7) | 13.7                              | (5.9 - 22.5) | 0.079        |
| <b>Race</b>                                                                 |                                   |              |                                       |              |                                   |              |              |
| American/Alaskan Native                                                     | 0                                 | 0.0%         | 1                                     | 1.6%         | 0                                 | 0.0%         | 0.735        |
| Asian                                                                       | 1                                 | 3.7%         | 1                                     | 1.6%         | 0                                 | 0.0%         | 0.696        |
| Black or African American                                                   | 3                                 | 11.1%        | 7                                     | 10.9%        | 0                                 | 0.0%         | 0.482        |
| White                                                                       | 23                                | 85.2%        | 55                                    | 85.9%        | 12                                | 100.0%       | 0.373        |
| Unknown                                                                     | 1                                 |              | 9                                     |              | 0                                 |              |              |
| <b>Ethnicity</b>                                                            |                                   |              |                                       |              |                                   |              |              |
| Hispanic                                                                    | 7                                 | 25.0%        | 7                                     | 10.3%        | 3                                 | 25.0%        | 0.128        |
| Not Hispanic                                                                | 21                                | 75.0%        | 61                                    | 89.7%        | 9                                 | 75.0%        |              |
| Unknown                                                                     | 0                                 |              | 5                                     |              | 0                                 |              |              |
| <b>Cytogenetics</b>                                                         |                                   |              |                                       |              |                                   |              |              |
| Normal                                                                      | 12                                | 42.9%        | 19                                    | 26.8%        | 2                                 | 16.7%        | 0.166        |
| t(8;21)                                                                     | 1                                 | 3.6%         | 12                                    | 16.9%        | 2                                 | 16.7%        | 0.205        |
| inv(16)                                                                     | 3                                 | 10.7%        | 17                                    | 23.9%        | 4                                 | 33.3%        | 0.206        |
| KMT2A-rearranged                                                            | 3                                 | 10.7%        | 8                                     | 11.3%        | 1                                 | 8.3%         | 0.955        |
| t(6;9)                                                                      | 0                                 | 0.0%         | 2                                     | 2.8%         | 1                                 | 8.3%         | 0.328        |
| monosomy 7                                                                  | 0                                 | 0.0%         | 0                                     | 0.0%         | 1                                 | 8.3%         | <b>0.016</b> |
| del(7q)                                                                     | 1                                 | 3.6%         | 1                                     | 1.4%         | 0                                 | 0.0%         | 0.678        |
| monosomy 5/del(5q)                                                          | 0                                 | 0.0%         | 1                                     | 1.4%         | 0                                 | 0.0%         | 0.753        |

|                                           |    |       |    |       |    |        |              |
|-------------------------------------------|----|-------|----|-------|----|--------|--------------|
| +8                                        | 2  | 7.1%  | 2  | 2.8%  | 1  | 8.3%   | 0.514        |
| Other                                     | 6  | 21.4% | 9  | 12.7% | 0  | 0.0%   | 0.195        |
| Unknown                                   | 0  |       | 2  |       | 0  |        |              |
| <b>French-American-British morphology</b> |    |       |    |       |    |        |              |
| M0                                        | 1  | 4.3%  | 1  | 1.5%  | 0  | 0.0%   | 0.627        |
| M1                                        | 5  | 21.7% | 7  | 10.8% | 1  | 9.1%   | 0.374        |
| M2                                        | 4  | 17.4% | 21 | 32.3% | 3  | 27.3%  | 0.393        |
| M4                                        | 7  | 30.4% | 24 | 36.9% | 5  | 45.5%  | 0.687        |
| M5                                        | 3  | 13.0% | 8  | 12.3% | 1  | 9.1%   | 0.944        |
| M6                                        | 1  | 4.3%  | 0  | 0.0%  | 0  | 0.0%   | 0.188        |
| M7                                        | 0  | 0.0%  | 1  | 1.5%  | 0  | 0.0%   | 0.768        |
| Other                                     | 2  | 8.7%  | 3  | 4.6%  | 1  | 9.1%   | 0.706        |
| Unknown                                   | 5  |       | 8  |       | 1  |        |              |
| <b>FLT3/ITD status</b>                    |    |       |    |       |    |        |              |
| Positive                                  | 6  | 21.4% | 13 | 17.8% | 5  | 45.5%  | 0.114        |
| Negative (WT)                             | 22 | 78.6% | 60 | 82.2% | 6  | 54.5%  |              |
| Unknown                                   | 0  |       | 0  |       | 1  |        |              |
| <b>CEBP<math>\alpha</math> status</b>     |    |       |    |       |    |        |              |
| Mutated                                   | 3  | 10.7% | 8  | 11.1% | 0  | 0.0%   | 0.510        |
| Wild-type                                 | 25 | 89.3% | 64 | 87.7% | 11 | 100.0% |              |
| Unknown                                   | 0  |       | 1  |       | 1  |        |              |
| <b>NPM status</b>                         |    |       |    |       |    |        |              |
| Mutated                                   | 6  | 21.4% | 10 | 13.9% | 0  | 0.0%   | 0.225        |
| Wild-type                                 | 22 | 78.6% | 62 | 86.1% | 11 | 100.0% |              |
| Unknown                                   | 0  |       | 1  |       | 1  |        |              |
| <b>WT1 status</b>                         |    |       |    |       |    |        |              |
| Mutated                                   | 2  | 7.1%  | 6  | 8.3%  | 1  | 9.1%   | 0.973        |
| Wild-type                                 | 26 | 92.9% | 66 | 91.7% | 10 | 90.9%  |              |
| Unknown                                   | 0  |       | 1  |       | 1  |        |              |
| <b>Cytomolecular Risk<sup>1</sup></b>     |    |       |    |       |    |        |              |
| Standard                                  | 13 | 46.4% | 15 | 21.1% | 2  | 16.7%  | <b>0.027</b> |
| Low                                       | 13 | 46.4% | 44 | 62.0% | 6  | 50.0%  | 0.328        |
| High                                      | 2  | 7.1%  | 12 | 16.9% | 4  | 33.3%  | 0.116        |
| Unknown                                   | 0  |       | 2  |       | 0  |        |              |
| <b>MRD at End Induction 1</b>             |    |       |    |       |    |        |              |
| Positive <sup>2</sup>                     | 5  | 21.7% | 18 | 31.6% | 6  | 50.0%  | 0.233        |

|                                                    |             |           |             |           |             |             |                  |
|----------------------------------------------------|-------------|-----------|-------------|-----------|-------------|-------------|------------------|
| Negative                                           | 18          | 78.3%     | 39          | 68.4%     | 6           | 50.0%       |                  |
| Unknown                                            | 5           |           | 16          |           | 0           |             |                  |
| <b>Morphology at End Induction 1</b>               |             |           |             |           |             |             |                  |
| CR <sup>3</sup>                                    | 25          | 89.3%     | 54          | 76.1%     | 7           | 58.3%       | 0.089            |
| Not CR                                             | 3           | 10.7%     | 17          | 23.9%     | 5           | 41.7%       |                  |
| Unevaluable                                        | 0           |           | 2           |           | 0           |             |                  |
| <b>WBC at study entry (x10<sup>3</sup>/MicroL)</b> |             |           |             |           |             |             |                  |
| <100                                               | 25          | 89.3%     | 55          | 75.3%     | 9           | 75.0%       | 0.292            |
| ≥100                                               | 3           | 10.7%     | 18          | 24.7%     | 3           | 25.0%       |                  |
| <b>BM Blast% at study entry</b>                    |             |           |             |           |             |             |                  |
| Median (range)                                     | 66          | (31 - 96) | 72          | (3 - 100) | 70          | (36 - 100)  | 0.623            |
| <b>Blood Blast% at study entry</b>                 |             |           |             |           |             |             |                  |
| Median (range)                                     | 53          | (0 - 95)  | 48.7        | (0 - 97)  | 59          | (28 - 88.5) | 0.646            |
| <b>Outcomes</b>                                    |             |           |             |           |             |             |                  |
| 5 year EFS from study entry <sup>4</sup>           | 28.6 ± 17.1 |           | 62.8 ± 11.6 |           | 33.3 ± 27.2 |             | <b>&lt;0.001</b> |
| 5 year OS from study entry <sup>4</sup>            | 45.5 ± 19.1 |           | 75.0 ± 10.6 |           | 58.3 ± 28.5 |             | <b>0.009</b>     |

1. Cytomolecular risk groups: Low: t(8;21), inv(16), NPM1<sup>mut</sup>, CEBPα<sup>mut</sup>; High: monosomy 5/7, FLT3/ITD with allelic ratio > 0.4; Standard: no low or high risk criteria with known cytogenetics
2. Minimal residual disease by flow cytometry, positive: ≥0.02%
3. CR: complete remission with <5% blasts by morphology
4. Percent ± 2SE% with log-rank p-values

| <b>Supplemental Table S9. Top Enriched Functions*</b>                                                                                          |                                         |                |
|------------------------------------------------------------------------------------------------------------------------------------------------|-----------------------------------------|----------------|
| <b>Categories</b>                                                                                                                              | <b>Diseases or Functions Annotation</b> | <b>p-value</b> |
| Cellular Growth and Proliferation,Lymphoid Tissue Structure and Development                                                                    | Proliferation of lymphatic system cells | 3.67E-06       |
| Cellular Development,Cellular Growth and Proliferation                                                                                         | Proliferation of blood cells            | 8.98E-06       |
| Cellular Development,Cellular Growth and Proliferation,Hematological System Development and Function,Lymphoid Tissue Structure and Development | Proliferation of mononuclear leukocytes | 3.26E-05       |
| Cellular Movement                                                                                                                              | Invasion of tumor cell lines            | 2.32E-04       |
| Cancer,Organismal Injury and Abnormalities,Reproductive System Disease                                                                         | Breast or ovarian cancer                | 2.07E-03       |
| Cancer,Organismal Injury and Abnormalities,Reproductive System Disease                                                                         | Breast cancer                           | 5.56E-03       |
| Cellular Development,Cellular Growth and Proliferation                                                                                         | Cell proliferation of tumor cell lines  | 6.66E-03       |
| Cell Death and Survival                                                                                                                        | Cell viability                          | 8.81E-03       |
| Cancer,Neurological Disease,Organismal Injury and Abnormalities                                                                                | High grade astrocytoma                  | 8.96E-03       |
| Cancer,Neurological Disease,Organismal Injury and Abnormalities                                                                                | Glioma                                  | 8.97E-03       |
| Inflammatory Disease                                                                                                                           | Chronic inflammatory disorder           | 9.50E-03       |
| Cancer,Organismal Injury and Abnormalities                                                                                                     | Breast or pancreatic cancer             | 1.60E-02       |
| Cancer,Endocrine System Disorders,Organismal Injury and Abnormalities,Reproductive System Disease                                              | Ovarian cancer                          | 1.62E-02       |
| Gene Expression                                                                                                                                | Transcription                           | 1.65E-02       |
| Cancer,Hematological Disease,Organismal Injury and Abnormalities                                                                               | Mature lymphocytic neoplasm             | 1.87E-02       |
| Gene Expression                                                                                                                                | Transcription of DNA                    | 2.16E-02       |

\*Functions with >5 genes in the category



# Supplemental Figure S1

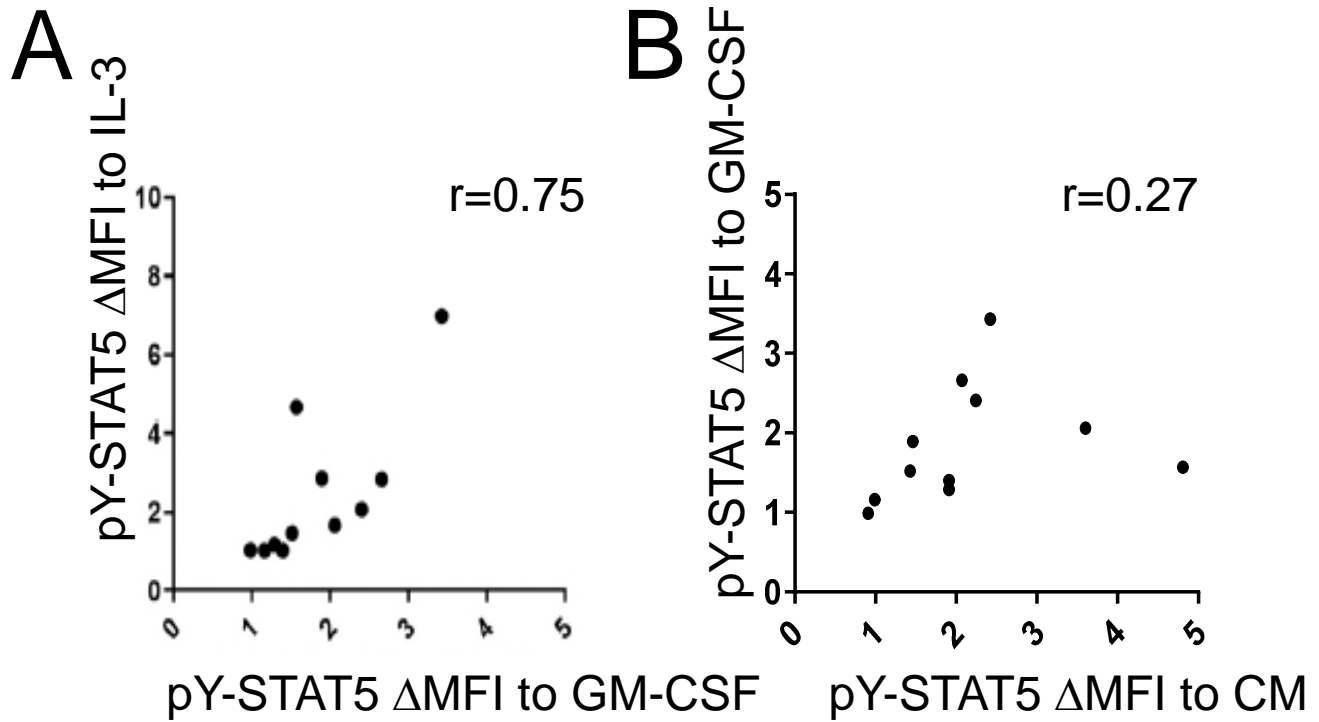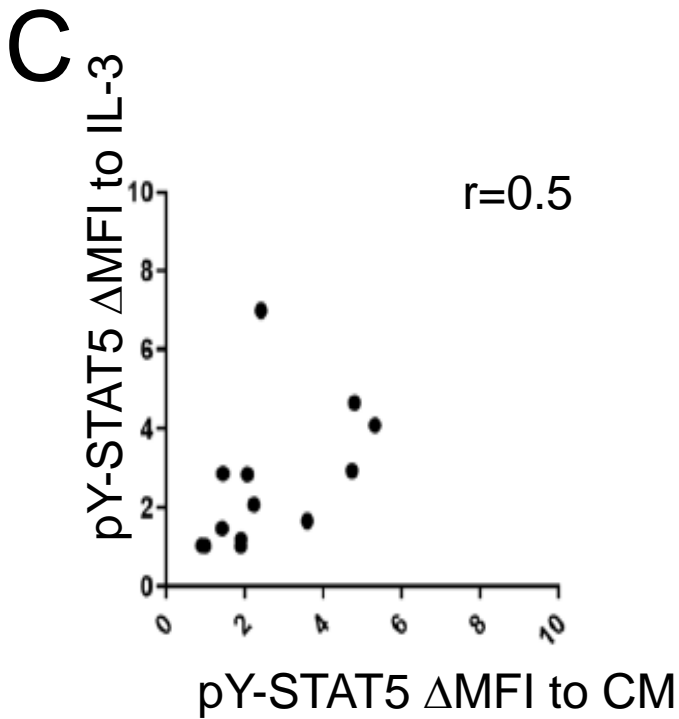

**Figure S1. STAT5 responses to GM-CSF and IL-3 were strongly correlated with each other but not with STAT5 responses to CM. (A)** The pY-STAT5  $\Delta$ MFI in response to GM-CSF and IL-3, which use the same CD131 signal transducing subunit, were strongly correlated ( $n=11$ ). The pY-STAT5  $\Delta$ MFI in response to **(B)** GM-CSF and **(C)** IL-3 were not related to the responses to the cocktail of factors present in CM ( $n=11-13$ ).  $r$  = Pearson correlation coefficient.

# Supplemental Figure S2

## A

|                    | G-CSF<br>$\Delta$ MFI | IL-6<br>$\Delta$ MFI | CM<br>$\Delta$ MFI |
|--------------------|-----------------------|----------------------|--------------------|
| Basal pY-STAT3 MFI | -0.18                 | -0.22                | -0.20              |
| Basal pY-STAT5 MFI | -0.33                 | -0.48                | -0.10              |
| Basal pERK1/2 MFI  | -0.25                 | -0.09                | -0.24              |

## B

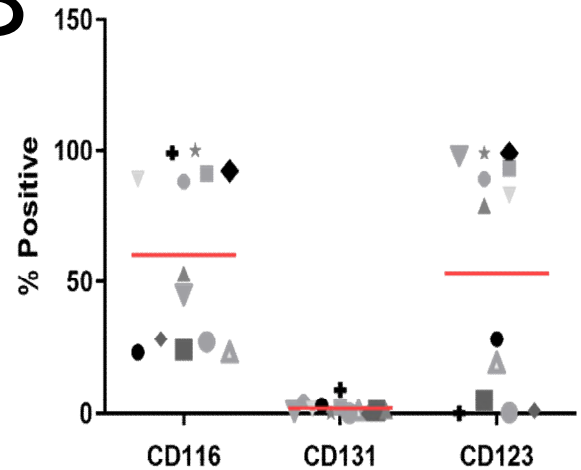

## C

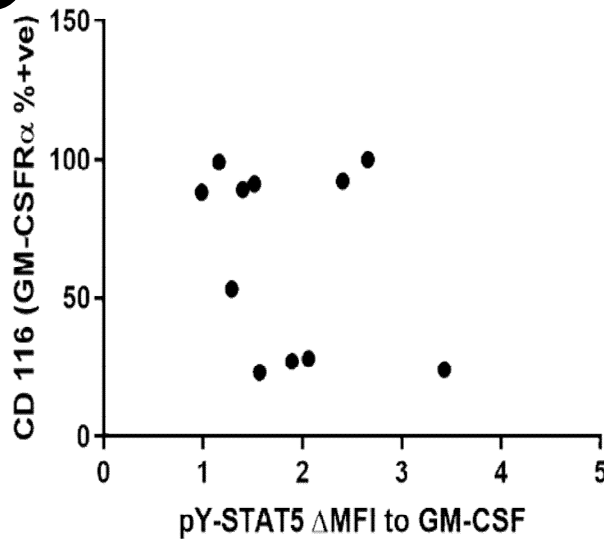

## D

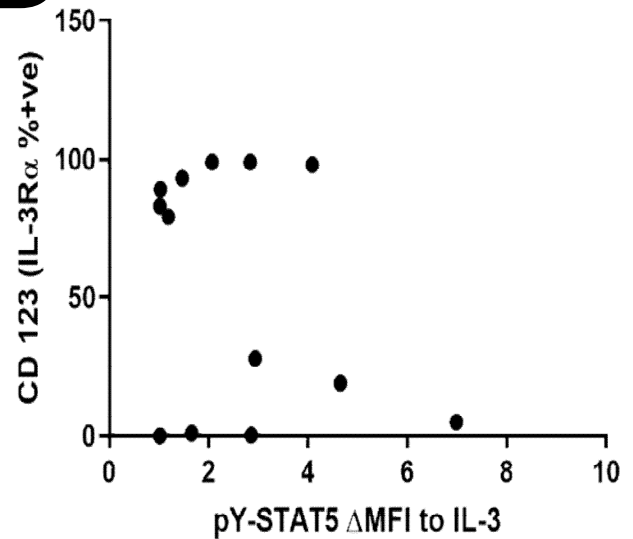

**Figure S2. Dysfunctional STAT3/5 activation is not due to elevated basal activation or to absence of surface receptors. (A)** The heatmap illustrates the degree of correlation for each ligand-induced  $\Delta$ MFI and its corresponding basal MFI. Numbers represent the Pearson correlation coefficient ( $r$ ). **(B)** Primary AML samples were stained for the CD116 (GM-CSF receptor alpha), CD123 (IL-3 receptor alpha), and CD131 (common beta receptor). The percent of events in the positive region are shown ( $n=13$ ). **(C, D)** Ligand-induced pY-STAT5  $\Delta$ MFI were not related to the expression of the ligand's receptor ( $n=11-13$ ).

## Supplemental Figure S3

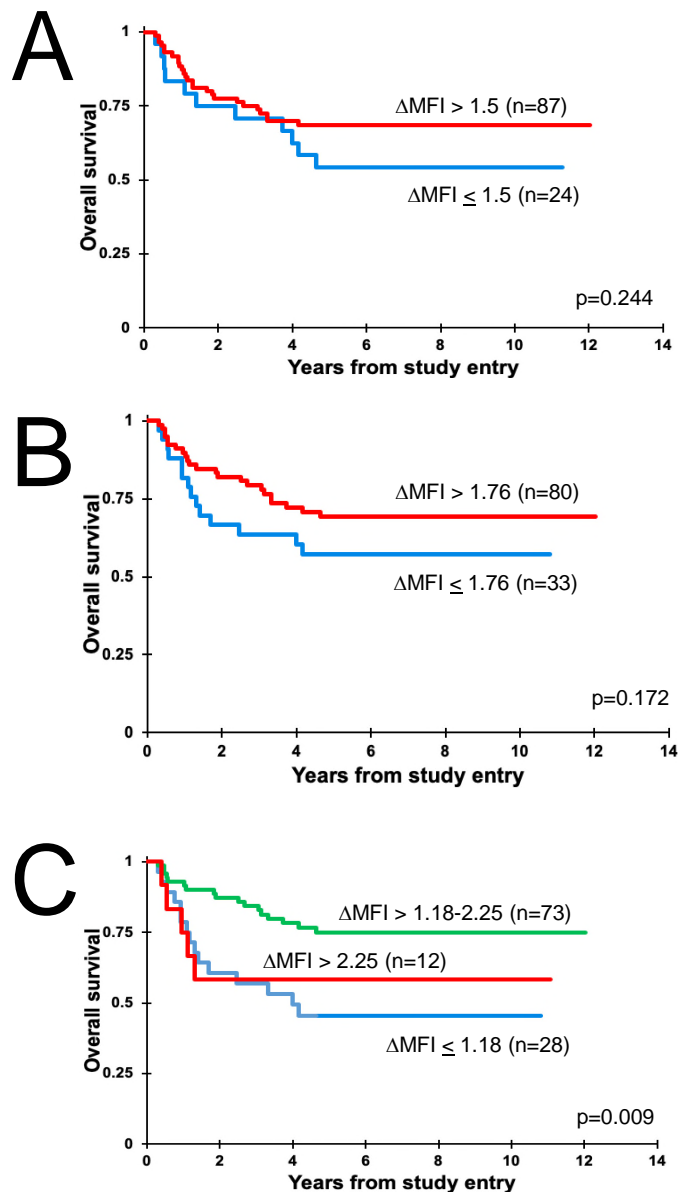

**Figure S3. Inducible pY-STAT5, but not pY-STAT3, was associated with overall survival. (A)** Patients whose AML cells had a G-CSF-induced pY-STAT3 DMFI  $\leq 1.5$  had a 5-year OS of  $54.2 \pm 20.3\%$  compared to  $68.4 \pm 10.3\%$  for patients with a DMFI  $> 1.5$  ( $p=0.244$ ). **(B)** Patients whose AML cells had a CM-induced pY-STAT3 DMFI  $\leq 1.76$  had a 5-year OS of  $57.1 \pm 17.4\%$  v.  $69.2 \pm 10.8\%$  for those with DMFI  $> 1.76$  ( $p=0.172$ ). **(C)** Patients with CM-induced pY-STAT5 DMFI  $\leq 1.18$  and patients with CM-induced pY-STAT5 DMFI  $> 2.25$  had 5-year OS of  $45.5 \pm 19.1\%$  and  $58.3 \pm 28.5\%$  respectively, compared to the patients in the intermediate response group ( $75.0 \pm 10.6\%$ ; ( $p=0.009$ ).

# Supplemental Figure S4

## A

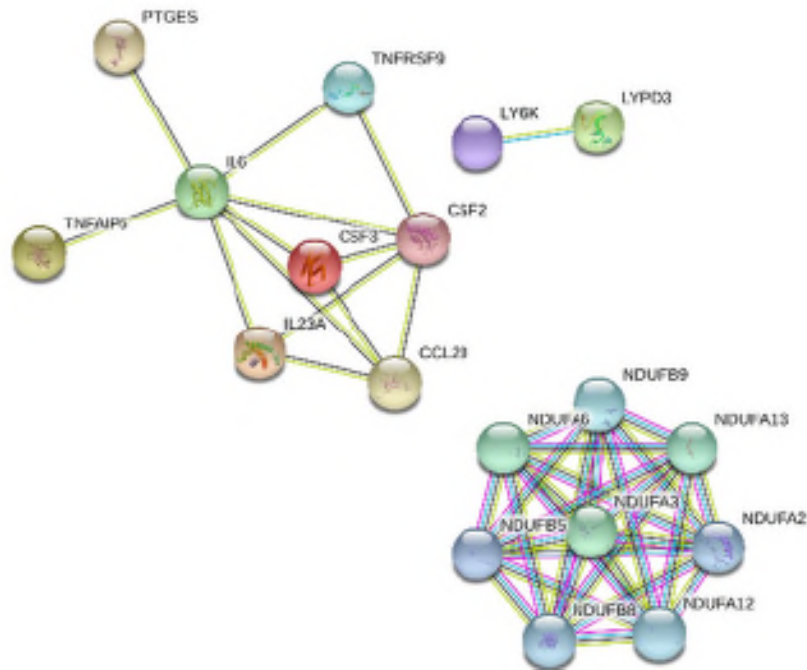

## B

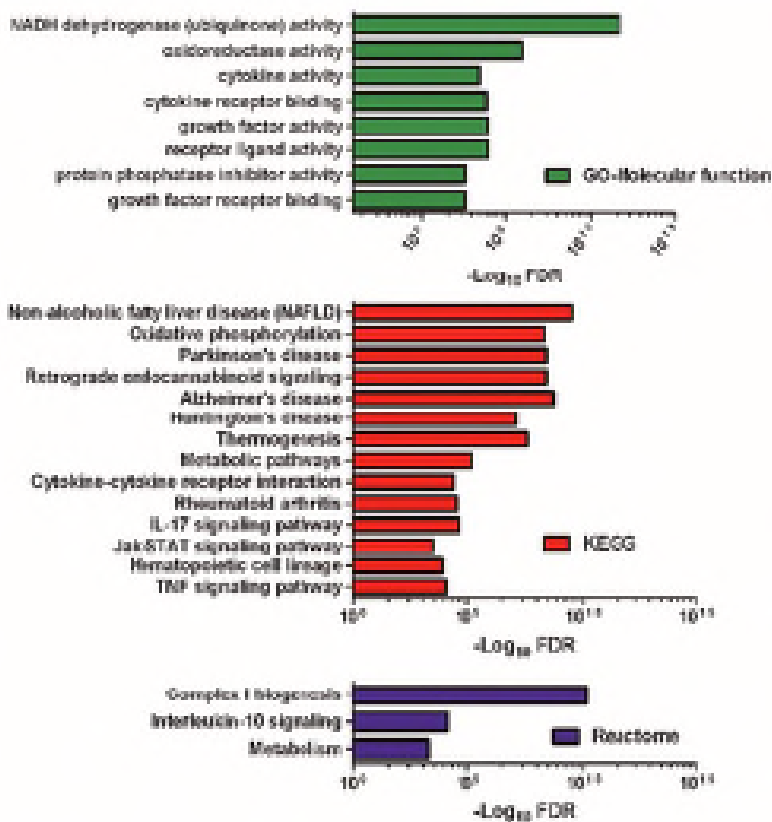

**Figure S4. STRING analysis of enriched functions in the low pY-STAT3/5 response groups. (A)** The genes that were commonly upregulated in all 3 low response groups (Table 3) were used as query in STRING 11.0 to visualize the predicted protein-protein interactions (PPI). The network interaction has a PPI enrichment p-value of  $2.77 \times 10^{-11}$ . **(B)** Functional pathway enrichment analysis was performed using the STRING 11.0 protein-based algorithm. The pathway enrichment data from KEGG, Reactome pathways, and GO annotation for molecular functions are presented with  $-\text{Log}_{10}$  FDR.
